# Supplementary material
Source: publisher figshare collection journal article supplement (https://osapublishing.figshare.com/ndownloader/files/8272130)
Supplement: Supplementary file 1 [file 8272130]

All dimensions are expressed as multiplies of the photonic lattice constant a
Wire source position: x = -18, y = 0
Hole number	x	y	Radius
1	2.600000	0.000000	0.30
2	2.456770	0.851050	0.30
3	1.965420	1.702100	0.30
4	3.733330	0.000000	0.30
5	3.432590	0.849346	0.30
6	3.001110	1.732690	0.30
7	2.451850	2.548040	0.30
8	4.866670	0.000000	0.30
9	4.451050	0.856605	0.30
10	3.995310	1.730020	0.30
11	3.495890	2.595030	0.30
12	2.967370	3.426420	0.30
13	1.300000	2.251670	0.30
14	0.491354	2.553150	0.30
15	-0.491354	2.553150	0.30
16	1.845020	3.195670	0.30
17	0.980740	3.397380	0.30
18	0.000000	3.465380	0.30
19	-0.980740	3.397380	0.30
20	1.483680	4.283020	0.30
21	0.499413	4.325050	0.30
22	-0.499413	4.325050	0.30
23	-1.483680	4.283020	0.30
24	-1.300000	2.251670	0.30
25	-1.965420	1.702100	0.30
26	-2.456770	0.851050	0.30
27	-1.866670	3.233160	0.30
28	-2.451850	2.548040	0.30
29	-3.001110	1.732690	0.30
30	-3.432590	0.849346	0.30
31	-2.433330	4.214660	0.30
32	-2.967370	3.426420	0.30
33	-3.495890	2.595030	0.30
34	-3.995310	1.730020	0.30
35	-4.451050	0.856605	0.30
36	-2.600000	0.000000	0.30
37	-2.456770	-0.851050	0.30
38	-1.965420	-1.702100	0.30
39	-3.690040	0.000000	0.30
40	-3.432590	-0.849346	0.30
41	-3.001110	-1.732690	0.30
42	-2.451850	-2.548040	0.30
43	-4.451050	-0.856605	0.30
44	-3.995310	-1.730020	0.30
45	-3.495890	-2.595030	0.30
46	-2.967370	-3.426420	0.30
47	-1.300000	-2.251670	0.30
48	-0.491354	-2.553150	0.30
49	0.491354	-2.553150	0.30
50	-1.866670	-3.233160	0.30
51	-0.980740	-3.397380	0.30
52	0.000000	-3.465380	0.30
53	0.980740	-3.397380	0.30
54	-2.433330	-4.214660	0.30
55	-1.483680	-4.283020	0.30
56	-0.499413	-4.325050	0.30
57	0.499413	-4.325050	0.30
58	1.483680	-4.283020	0.30
59	1.300000	-2.251670	0.30
60	1.965420	-1.702100	0.30
61	2.456770	-0.851050	0.30
62	1.845020	-3.195670	0.30
63	2.451850	-2.548040	0.30
64	3.001110	-1.732690	0.30
65	3.432590	-0.849346	0.30
66	2.967370	-3.426420	0.30
67	3.495890	-2.595030	0.30
68	3.995310	-1.730020	0.30
69	4.451050	-0.856605	0.30
70	1.620000	0.000000	0.40
71	1.402960	0.810000	0.40
72	0.810000	1.402960	0.40
73	0.000000	1.620000	0.40
74	-0.810000	1.402960	0.40
75	-1.402960	0.810000	0.40
76	-1.620000	0.000000	0.40
77	-1.402960	-0.810000	0.40
78	-0.810000	-1.402960	0.40
79	0.000000	-1.620000	0.40
80	0.810000	-1.402960	0.40
81	1.402960	-0.810000	0.40
82	0.000000	0.000000	0.92
83	-5.000000	1.732050	0.30
84	-5.000000	-1.732050	0.30
85	-6.000000	1.732050	0.30
86	-6.000000	-1.732050	0.30
87	-7.000000	1.732050	0.30
88	-7.000000	-1.732050	0.30
89	-8.000000	1.732050	0.30
90	-8.000000	-1.732050	0.30
91	-9.000000	1.732050	0.30
92	-9.000000	-1.732050	0.30
93	-10.000000	1.732050	0.30
94	-10.000000	-1.732050	0.30
95	-11.000000	1.732050	0.30
96	-11.000000	-1.732050	0.30
97	-12.000000	1.732050	0.30
98	-12.000000	-1.732050	0.30
99	-13.000000	1.732050	0.30
100	-13.000000	-1.732050	0.30
101	-14.000000	1.732050	0.30
102	-14.000000	-1.732050	0.30
103	-15.000000	1.732050	0.30
104	-15.000000	-1.732050	0.30
105	-16.000000	1.732050	0.30
106	-16.000000	-1.732050	0.30
107	-17.000000	1.732050	0.30
108	-17.000000	-1.732050	0.30
109	-18.000000	1.732050	0.30
110	-18.000000	-1.732050	0.30
111	-4.000000	3.464100	0.30
112	-4.000000	-3.464100	0.30
113	-5.000000	3.464100	0.30
114	-5.000000	-3.464100	0.30
115	-6.000000	3.464100	0.30
116	-6.000000	-3.464100	0.30
117	-7.000000	3.464100	0.30
118	-7.000000	-3.464100	0.30
119	-8.000000	3.464100	0.30
120	-8.000000	-3.464100	0.30
121	-9.000000	3.464100	0.30
122	-9.000000	-3.464100	0.30
123	-10.000000	3.464100	0.30
124	-10.000000	-3.464100	0.30
125	-11.000000	3.464100	0.30
126	-11.000000	-3.464100	0.30
127	-12.000000	3.464100	0.30
128	-12.000000	-3.464100	0.30
129	-13.000000	3.464100	0.30
130	-13.000000	-3.464100	0.30
131	-14.000000	3.464100	0.30
132	-14.000000	-3.464100	0.30
133	-15.000000	3.464100	0.30
134	-15.000000	-3.464100	0.30
135	-16.000000	3.464100	0.30
136	-16.000000	-3.464100	0.30
137	-17.000000	3.464100	0.30
138	-17.000000	-3.464100	0.30
139	-18.000000	3.464100	0.30
140	-18.000000	-3.464100	0.30
141	-5.500000	0.776025	0.30
142	-5.500000	-0.776025	0.30
143	-6.500000	0.776025	0.30
144	-6.500000	-0.776025	0.30
145	-7.500000	0.776025	0.30
146	-7.500000	-0.776025	0.30
147	-8.500000	0.776025	0.30
148	-8.500000	-0.776025	0.30
149	-9.500000	0.776025	0.30
150	-9.500000	-0.776025	0.30
151	-10.500000	0.776025	0.30
152	-10.500000	-0.776025	0.30
153	-11.500000	0.776025	0.30
154	-11.500000	-0.776025	0.30
155	-12.500000	0.776025	0.30
156	-12.500000	-0.776025	0.30
157	-13.500000	0.776025	0.30
158	-13.500000	-0.776025	0.30
159	-14.500000	0.776025	0.30
160	-14.500000	-0.776025	0.30
161	-15.500000	0.776025	0.30
162	-15.500000	-0.776025	0.30
163	-16.500000	0.776025	0.30
164	-16.500000	-0.776025	0.30
165	-17.500000	0.776025	0.17
166	-17.500000	-0.776025	0.17
167	-4.500000	2.598080	0.30
168	-4.500000	-2.598080	0.30
169	-5.500000	2.598080	0.30
170	-5.500000	-2.598080	0.30
171	-6.500000	2.598080	0.30
172	-6.500000	-2.598080	0.30
173	-7.500000	2.598080	0.30
174	-7.500000	-2.598080	0.30
175	-8.500000	2.598080	0.30
176	-8.500000	-2.598080	0.30
177	-9.500000	2.598080	0.30
178	-9.500000	-2.598080	0.30
179	-10.500000	2.598080	0.30
180	-10.500000	-2.598080	0.30
181	-11.500000	2.598080	0.30
182	-11.500000	-2.598080	0.30
183	-12.500000	2.598080	0.30
184	-12.500000	-2.598080	0.30
185	-13.500000	2.598080	0.30
186	-13.500000	-2.598080	0.30
187	-14.500000	2.598080	0.30
188	-14.500000	-2.598080	0.30
189	-15.500000	2.598080	0.30
190	-15.500000	-2.598080	0.30
191	-16.500000	2.598080	0.30
192	-16.500000	-2.598080	0.30
193	-17.500000	2.598080	0.30
194	-17.500000	-2.598080	0.30
195	-3.500000	4.330130	0.30
196	-3.500000	-4.330130	0.30
197	-4.500000	4.330130	0.30
198	-4.500000	-4.330130	0.30
199	-5.500000	4.330130	0.30
200	-5.500000	-4.330130	0.30
201	-6.500000	4.330130	0.30
202	-6.500000	-4.330130	0.30
203	-7.500000	4.330130	0.30
204	-7.500000	-4.330130	0.30
205	-8.500000	4.330130	0.30
206	-8.500000	-4.330130	0.30
207	-9.500000	4.330130	0.30
208	-9.500000	-4.330130	0.30
209	-10.500000	4.330130	0.30
210	-10.500000	-4.330130	0.30
211	-11.500000	4.330130	0.30
212	-11.500000	-4.330130	0.30
213	-12.500000	4.330130	0.30
214	-12.500000	-4.330130	0.30
215	-13.500000	4.330130	0.30
216	-13.500000	-4.330130	0.30
217	-14.500000	4.330130	0.30
218	-14.500000	-4.330130	0.30
219	-15.500000	4.330130	0.30
220	-15.500000	-4.330130	0.30
221	-16.500000	4.330130	0.30
222	-16.500000	-4.330130	0.30
223	-17.500000	4.330130	0.30
224	-17.500000	-4.330130	0.30
225	-3.000000	5.196150	0.30
226	-4.000000	5.196150	0.30
227	-5.000000	5.196150	0.30
228	-6.000000	5.196150	0.30
229	-2.500000	6.062180	0.30
230	-3.500000	6.062180	0.30
231	-4.500000	6.062180	0.30
232	-2.000000	6.928200	0.30
233	-3.000000	6.928200	0.30
234	-1.500000	7.794230	0.30
235	1.000000	-5.196150	0.30
236	4.000000	-3.464100	0.30
237	1.500000	-6.062180	0.30
238	4.500000	-4.330130	0.30
239	2.000000	-6.928200	0.30
240	5.000000	-5.196150	0.30
241	2.500000	-7.794230	0.30
242	5.500000	-6.062180	0.30
243	3.000000	-8.660250	0.30
244	6.000000	-6.928200	0.30
245	3.500000	-9.526280	0.30
246	6.500000	-7.794230	0.30
247	4.000000	-10.392300	0.30
248	7.000000	-8.660250	0.30
249	4.500000	-11.258300	0.30
250	7.500000	-9.526280	0.30
251	5.000000	-12.124400	0.30
252	8.000000	-10.392300	0.30
253	5.500000	-12.990400	0.30
254	8.500000	-11.258300	0.30
255	6.000000	-13.856400	0.30
256	9.000000	-12.124400	0.30
257	6.500000	-14.722400	0.30
258	9.500000	-12.990400	0.30
259	7.000000	-15.588500	0.30
260	10.000000	-13.856400	0.30
261	7.500000	-16.454500	0.30
262	10.500000	-14.722400	0.30
263	-1.000000	-5.196150	0.30
264	5.000000	-1.732050	0.30
265	-0.500000	-6.062180	0.30
266	5.500000	-2.598080	0.30
267	0.000000	-6.928200	0.30
268	6.000000	-3.464100	0.30
269	0.500000	-7.794230	0.30
270	6.500000	-4.330130	0.30
271	1.000000	-8.660250	0.30
272	7.000000	-5.196150	0.30
273	1.500000	-9.526280	0.30
274	7.500000	-6.062180	0.30
275	2.000000	-10.392300	0.30
276	8.000000	-6.928200	0.30
277	2.500000	-11.258300	0.30
278	8.500000	-7.794230	0.30
279	3.000000	-12.124400	0.30
280	9.000000	-8.660250	0.30
281	3.500000	-12.990400	0.30
282	9.500000	-9.526280	0.30
283	4.000000	-13.856400	0.30
284	10.000000	-10.392300	0.30
285	4.500000	-14.722400	0.30
286	10.500000	-11.258300	0.30
287	5.000000	-15.588500	0.30
288	11.000000	-12.124400	0.30
289	5.500000	-16.454500	0.30
290	11.500000	-12.990400	0.30
291	6.000000	-17.320500	0.30
292	12.000000	-13.856400	0.30
293	2.077940	-5.151150	0.30
294	3.422060	-4.375130	0.30
295	2.577940	-6.017180	0.30
296	3.922060	-5.241150	0.30
297	3.077940	-6.883200	0.30
298	4.422060	-6.107180	0.30
299	3.577940	-7.749230	0.30
300	4.922060	-6.973200	0.30
301	4.077940	-8.615250	0.30
302	5.422060	-7.839230	0.30
303	4.577940	-9.481280	0.30
304	5.922060	-8.705250	0.30
305	5.077940	-10.347300	0.30
306	6.422060	-9.571280	0.30
307	5.577940	-11.213300	0.30
308	6.922060	-10.437300	0.30
309	6.077940	-12.079400	0.30
310	7.422060	-11.303300	0.30
311	6.577940	-12.945400	0.30
312	7.922060	-12.169400	0.30
313	7.077940	-13.811400	0.30
314	8.422060	-13.035400	0.30
315	7.577940	-14.677400	0.30
316	8.922060	-13.901400	0.30
317	8.077940	-15.543500	0.17
318	9.422060	-14.767400	0.17
319	0.000000	-5.196150	0.30
320	4.500000	-2.598080	0.30
321	0.500000	-6.062180	0.30
322	5.000000	-3.464100	0.30
323	1.000000	-6.928200	0.30
324	5.500000	-4.330130	0.30
325	1.500000	-7.794230	0.30
326	6.000000	-5.196150	0.30
327	2.000000	-8.660250	0.30
328	6.500000	-6.062180	0.30
329	2.500000	-9.526280	0.30
330	7.000000	-6.928200	0.30
331	3.000000	-10.392300	0.30
332	7.500000	-7.794230	0.30
333	3.500000	-11.258300	0.30
334	8.000000	-8.660250	0.30
335	4.000000	-12.124400	0.30
336	8.500000	-9.526280	0.30
337	4.500000	-12.990400	0.30
338	9.000000	-10.392300	0.30
339	5.000000	-13.856400	0.30
340	9.500000	-11.258300	0.30
341	5.500000	-14.722400	0.30
342	10.000000	-12.124400	0.30
343	6.000000	-15.588500	0.30
344	10.500000	-12.990400	0.30
345	6.500000	-16.454500	0.30
346	11.000000	-13.856400	0.30
347	-2.000000	-5.196150	0.30
348	5.500000	-0.866025	0.30
349	-1.500000	-6.062180	0.30
350	6.000000	-1.732050	0.30
351	-1.000000	-6.928200	0.30
352	6.500000	-2.598080	0.30
353	-0.500000	-7.794230	0.30
354	7.000000	-3.464100	0.30
355	0.000000	-8.660250	0.30
356	7.500000	-4.330130	0.30
357	0.500000	-9.526280	0.30
358	8.000000	-5.196150	0.30
359	1.000000	-10.392300	0.30
360	8.500000	-6.062180	0.30
361	1.500000	-11.258300	0.30
362	9.000000	-6.928200	0.30
363	2.000000	-12.124400	0.30
364	9.500000	-7.794230	0.30
365	2.500000	-12.990400	0.30
366	10.000000	-8.660250	0.30
367	3.000000	-13.856400	0.30
368	10.500000	-9.526280	0.30
369	3.500000	-14.722400	0.30
370	11.000000	-10.392300	0.30
371	4.000000	-15.588500	0.30
372	11.500000	-11.258300	0.30
373	4.500000	-16.454500	0.30
374	12.000000	-12.124400	0.30
375	5.000000	-17.320500	0.30
376	12.500000	-12.990400	0.30
377	-3.000000	-5.196150	0.30
378	-2.500000	-6.062180	0.30
379	-2.000000	-6.928200	0.30
380	-1.500000	-7.794230	0.30
381	-4.000000	-5.196150	0.30
382	-3.500000	-6.062180	0.30
383	-3.000000	-6.928200	0.30
384	-5.000000	-5.196150	0.30
385	-4.500000	-6.062180	0.30
386	-6.000000	-5.196150	0.30
387	4.000000	3.464100	0.30
388	1.000000	5.196150	0.30
389	4.500000	4.330130	0.30
390	1.500000	6.062180	0.30
391	5.000000	5.196150	0.30
392	2.000000	6.928200	0.30
393	5.500000	6.062180	0.30
394	2.500000	7.794230	0.30
395	6.000000	6.928200	0.30
396	3.000000	8.660250	0.30
397	6.500000	7.794230	0.30
398	3.500000	9.526280	0.30
399	7.000000	8.660250	0.30
400	4.000000	10.392300	0.30
401	7.500000	9.526280	0.30
402	4.500000	11.258300	0.30
403	8.000000	10.392300	0.30
404	5.000000	12.124400	0.30
405	8.500000	11.258300	0.30
406	5.500000	12.990400	0.30
407	9.000000	12.124400	0.30
408	6.000000	13.856400	0.30
409	9.500000	12.990400	0.30
410	6.500000	14.722400	0.30
411	10.000000	13.856400	0.30
412	7.000000	15.588500	0.30
413	10.500000	14.722400	0.30
414	7.500000	16.454500	0.30
415	5.000000	1.732050	0.30
416	-1.000000	5.196150	0.30
417	5.500000	2.598080	0.30
418	-0.500000	6.062180	0.30
419	6.000000	3.464100	0.30
420	0.000000	6.928200	0.30
421	6.500000	4.330130	0.30
422	0.500000	7.794230	0.30
423	7.000000	5.196150	0.30
424	1.000000	8.660250	0.30
425	7.500000	6.062180	0.30
426	1.500000	9.526280	0.30
427	8.000000	6.928200	0.30
428	2.000000	10.392300	0.30
429	8.500000	7.794230	0.30
430	2.500000	11.258300	0.30
431	9.000000	8.660250	0.30
432	3.000000	12.124400	0.30
433	9.500000	9.526280	0.30
434	3.500000	12.990400	0.30
435	10.000000	10.392300	0.30
436	4.000000	13.856400	0.30
437	10.500000	11.258300	0.30
438	4.500000	14.722400	0.30
439	11.000000	12.124400	0.30
440	5.000000	15.588500	0.30
441	11.500000	12.990400	0.30
442	5.500000	16.454500	0.30
443	12.000000	13.856400	0.30
444	6.000000	17.320500	0.30
445	3.422060	4.375130	0.30
446	2.077940	5.151150	0.30
447	3.922060	5.241150	0.30
448	2.577940	6.017180	0.30
449	4.422060	6.107180	0.30
450	3.077940	6.883200	0.30
451	4.922060	6.973200	0.30
452	3.577940	7.749230	0.30
453	5.422060	7.839230	0.30
454	4.077940	8.615250	0.30
455	5.922060	8.705250	0.30
456	4.577940	9.481280	0.30
457	6.422060	9.571280	0.30
458	5.077940	10.347300	0.30
459	6.922060	10.437300	0.30
460	5.577940	11.213300	0.30
461	7.422060	11.303300	0.30
462	6.077940	12.079400	0.30
463	7.922060	12.169400	0.30
464	6.577940	12.945400	0.30
465	8.422060	13.035400	0.30
466	7.077940	13.811400	0.30
467	8.922060	13.901400	0.30
468	7.577940	14.677400	0.30
469	9.422060	14.767400	0.17
470	8.077940	15.543500	0.17
471	4.500000	2.598080	0.30
472	0.000000	5.196150	0.30
473	5.000000	3.464100	0.30
474	0.500000	6.062180	0.30
475	5.500000	4.330130	0.30
476	1.000000	6.928200	0.30
477	6.000000	5.196150	0.30
478	1.500000	7.794230	0.30
479	6.500000	6.062180	0.30
480	2.000000	8.660250	0.30
481	7.000000	6.928200	0.30
482	2.500000	9.526280	0.30
483	7.500000	7.794230	0.30
484	3.000000	10.392300	0.30
485	8.000000	8.660250	0.30
486	3.500000	11.258300	0.30
487	8.500000	9.526280	0.30
488	4.000000	12.124400	0.30
489	9.000000	10.392300	0.30
490	4.500000	12.990400	0.30
491	9.500000	11.258300	0.30
492	5.000000	13.856400	0.30
493	10.000000	12.124400	0.30
494	5.500000	14.722400	0.30
495	10.500000	12.990400	0.30
496	6.000000	15.588500	0.30
497	11.000000	13.856400	0.30
498	6.500000	16.454500	0.30
499	5.500000	0.866025	0.30
500	-2.000000	5.196150	0.30
501	6.000000	1.732050	0.30
502	-1.500000	6.062180	0.30
503	6.500000	2.598080	0.30
504	-1.000000	6.928200	0.30
505	7.000000	3.464100	0.30
506	-0.500000	7.794230	0.30
507	7.500000	4.330130	0.30
508	0.000000	8.660250	0.30
509	8.000000	5.196150	0.30
510	0.500000	9.526280	0.30
511	8.500000	6.062180	0.30
512	1.000000	10.392300	0.30
513	9.000000	6.928200	0.30
514	1.500000	11.258300	0.30
515	9.500000	7.794230	0.30
516	2.000000	12.124400	0.30
517	10.000000	8.660250	0.30
518	2.500000	12.990400	0.30
519	10.500000	9.526280	0.30
520	3.000000	13.856400	0.30
521	11.000000	10.392300	0.30
522	3.500000	14.722400	0.30
523	11.500000	11.258300	0.30
524	4.000000	15.588500	0.30
525	12.000000	12.124400	0.30
526	4.500000	16.454500	0.30
527	12.500000	12.990400	0.30
528	5.000000	17.320500	0.30
529	6.000000	0.000000	0.30
530	6.500000	0.866025	0.30
531	7.000000	1.732050	0.30
532	7.500000	2.598080	0.30
533	6.500000	-0.866025	0.30
534	7.000000	0.000000	0.30
535	7.500000	0.866025	0.30
536	7.000000	-1.732050	0.30
537	7.500000	-0.866025	0.30
538	7.500000	-2.598080	0.30
